# Supplementary material for: Selective hydrogenation of nitroarenes under mild conditions by the optimization of active sites in a well defined Co@NC catalyst
Source: Royal Society of Chemistry journal article supplement (doi:10.1039/d0gc01835j), 2020-01-01
Supplement: d0gc01835j1.pdf [file d0gc01835j1.pdf]

**Selective hydrogenation of nitroarenes under mild conditions  
by the optimization of active sites in a well defined Co@NC  
catalyst**

Shuo Chen<sup>+</sup>, Li-Li Ling<sup>+</sup>, Shun-Feng Jiang, Hong Jiang\*

CAS Key Laboratory of Urban Pollutants Conversion, Department of Applied  
Chemistry, University of Science and Technology of China, Hefei 230026, China.

Email: [jhong@ustc.edu.cn](mailto:jhong@ustc.edu.cn) (H. J.)

## Text S1

The conversion rate and selectivity were evaluated based on the amount of nitrobenzene. Nitrobenzene conversion rate (mol%), product yield (mol%) and carbon balance:

$$\text{Nitrobenzene conversion} = \left(1 - \frac{\text{Moles of nitrobenzene}}{\text{Moles of nitrobenzene loaded}}\right) \times 100\%$$

$$\text{product yield} = \left(\frac{\text{Moles of product}}{\text{Moles of nitrobenzene loaded}}\right) \times 100\%$$

$$\text{carbon balance} = \left(\frac{\text{Moles of all products}}{\text{Moles of nitrobenzene loaded}}\right) \times 100\%$$

**Table S1 TOF of nitrobenzene hydrogenation compare with representative work**

| <b>No.</b> | <b>Catalyst</b>                   | <b>Reaction conditions</b>                             | <b>TOF×10<sup>-4</sup> (s<sup>-1</sup>)</b> | <b>Refs.</b>      |
|------------|-----------------------------------|--------------------------------------------------------|---------------------------------------------|-------------------|
| 1          | Co/CoO @Carbon                    | H <sub>2</sub> , 4MPa, 120°C                           | 7.01                                        | [1]               |
| 2          | Co@CN-400                         | H <sub>2</sub> , 1MPa, 60°C                            | 13.3                                        | [2]               |
| 3          | CeO <sub>2</sub> nanorods         | N <sub>2</sub> H <sub>4</sub> ·H <sub>2</sub> O, 80 °C | 13.9                                        | [3]               |
| 4          | 2.5%Co 25%Mo <sub>2</sub> C/ AC   | N <sub>2</sub> H <sub>4</sub> ·H <sub>2</sub> O, 80 °C | 4.9                                         | [4]               |
| 5          | Rh-Fe <sub>3</sub> O <sub>4</sub> | N <sub>2</sub> H <sub>4</sub> ·H <sub>2</sub> O, 80 °C | 9.8                                         | [4]               |
| 6          | Fe-Ni NPs                         | NaBH <sub>4</sub> , rt                                 | 47.62                                       | [5]               |
| 7          | Co@NC-800                         | N <sub>2</sub> H <sub>4</sub> ·H <sub>2</sub> O, 80 °C | 91.1                                        | <b>This study</b> |

**Table S2 Catalytic Hydrogenation of Nitrobenzene with different pyrolysis temperature**

| <b>Entry</b> | <b>Catalyst</b> | <b>T (°C)</b> | <b>Time (min)</b> | <b>Yield (%)</b> | <b>Sel (%)</b> |
|--------------|-----------------|---------------|-------------------|------------------|----------------|
| 1            | Co@NC           | 600           | 30                | 98               | 83             |
| 2            | Co@NC           | 800           | 30                | 100              | 97             |
| 3            | Co@NC           | 1000          | 30                | 100              | 70             |

**Table S3 Co weight content in Co@NC, Co-NC and Co@NC (al) by ICP-MS**

| Catalysts | Co%  |
|-----------|------|
| Co@NC     | 36.8 |
| Co-NC     | 32.1 |
| Co@NC(al) | 14.7 |

**Table S4 Atomic ratio of each element in the XPS spectrum**

| <b>Catalysts</b> | <b>C%</b> | <b>N%</b> | <b>O%</b> | <b>Co%</b> |
|------------------|-----------|-----------|-----------|------------|
| Co@NC            | 88.12     | 4.43      | 2.45      | 5          |
| Co-NC            | 82.88     | 5.56      | 3.87      | 7.69       |
| Co@NC(al)        | 90.02     | 9.41      | /         | 0.57       |

**Table S5 Weight ratio of each element in the XPS spectrum**

| Catalysts | C%   | N%   | O%  | Co%  |
|-----------|------|------|-----|------|
| Co@NC     | 78.2 | 4.3  | 2.7 | 20.2 |
| Co-NC     | 62.7 | 4.9  | 3.9 | 28.5 |
| Co@NC(al) | 86.8 | 10.6 | /   | 2.6  |

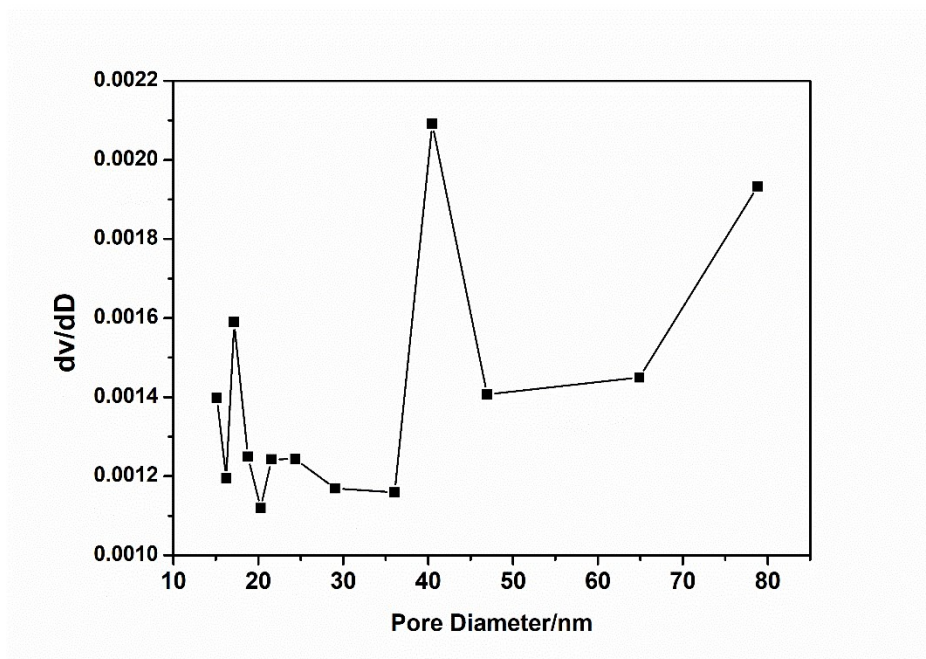

**Figure S1** The pore sizes distribution diagram derived of Co@NC



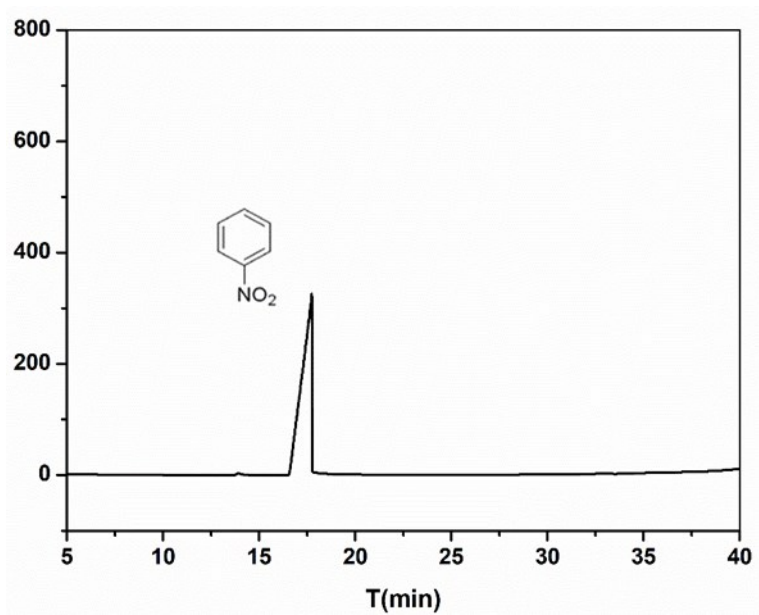

**Figure S2** The GC spectra of the solution after reaction. Reaction conditions: 1 mmol of nitrobenzene, 10 mg of catalyst, 5 mL of ethanol

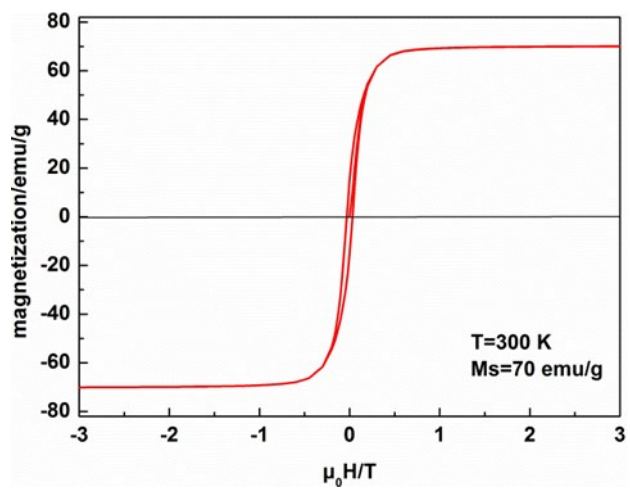

Figure S3 Magnetization data for Co@NC

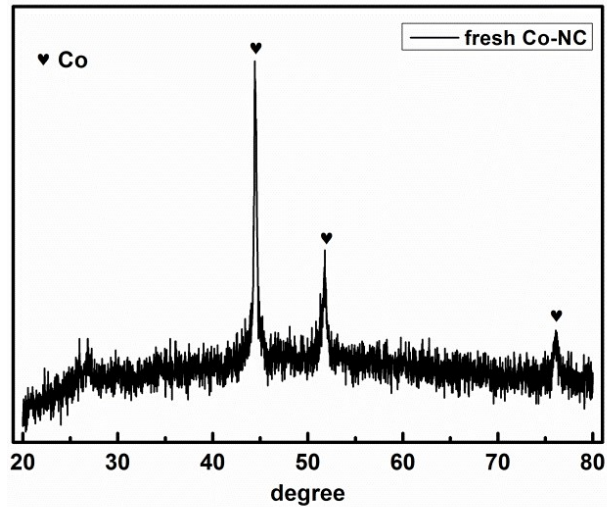

**Figure S4** XRD patterns of the Co-NC

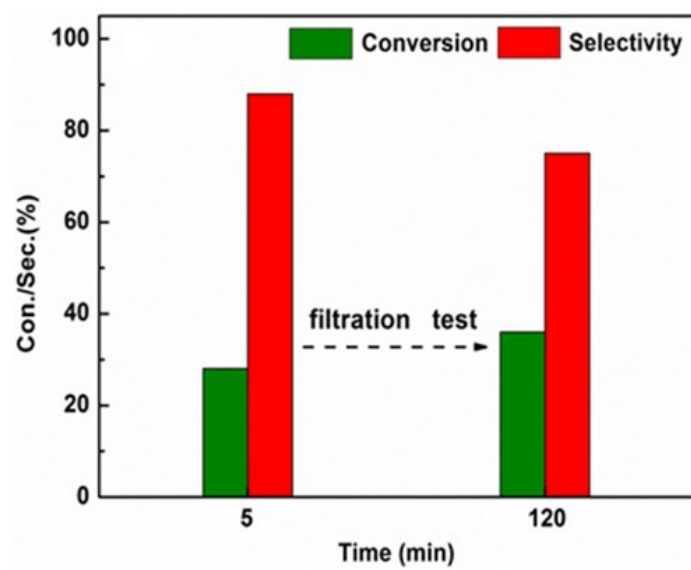

**Figure S5** Hot filtration test of the reduction of nitrobenzene with Co@NC as a catalyst.

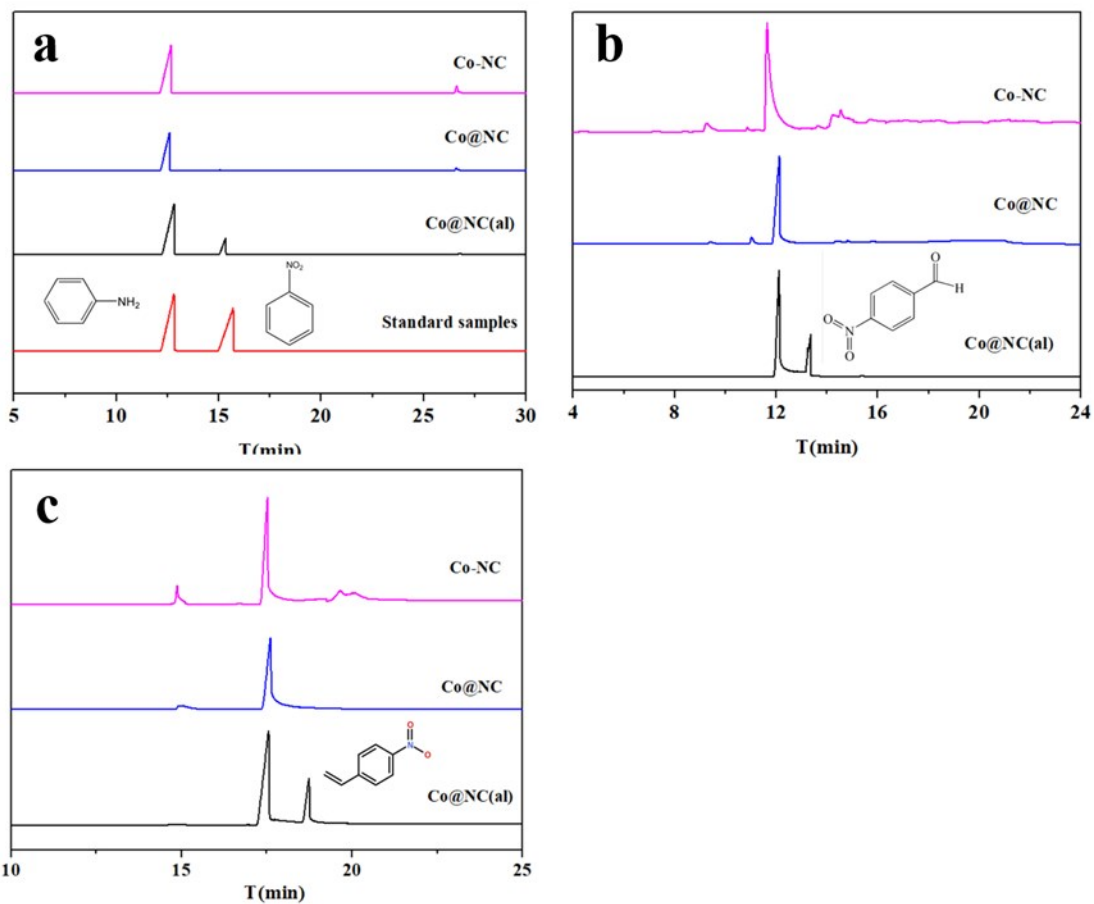

**Figure S6.** The GC spectra of the solution after reaction. (a) Nitrobenzene hydrogenation (b) p-nitrobenzaldehyde hydrogenation (c) p-nitrostyrene hydrogenation  
Reaction conditions: 1 mmol of nitrobenzene, 10 mg of catalyst, 5 mL of ethanol

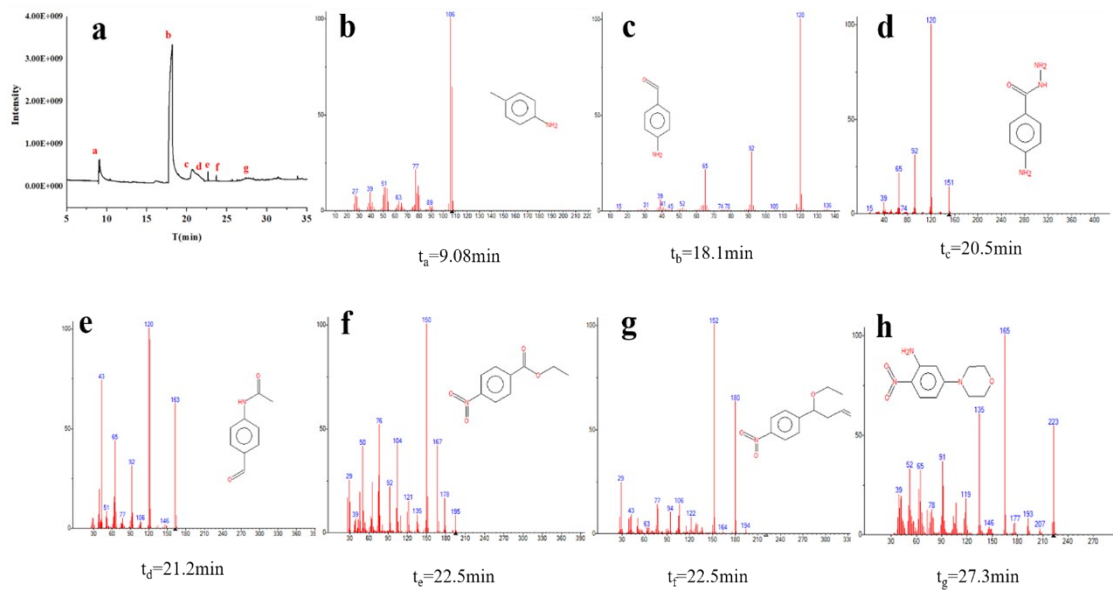

**Figure S7.** GC-MS analysis of Co-NC catalyst for p-nitrobenzaldehyde hydrogenation

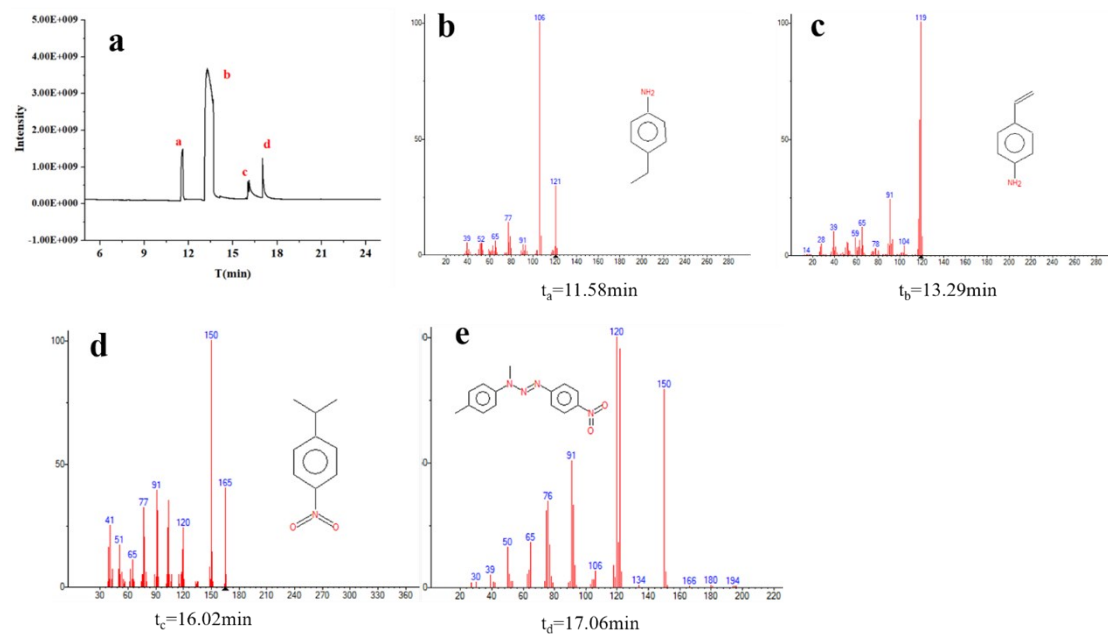

**Figure S8.** GC-MS analysis of Co-NC catalyst for p-nitrostyrene hydrogenation

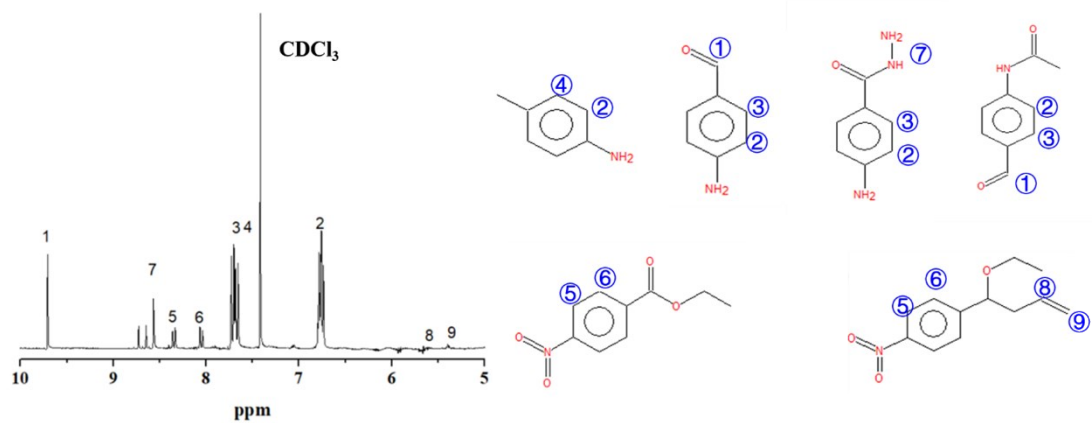

**Figure S9.**  $^1\text{H}$  NMR spectra analysis of Co-NC catalyst for p-nitrobenzaldehyde hydrogenation



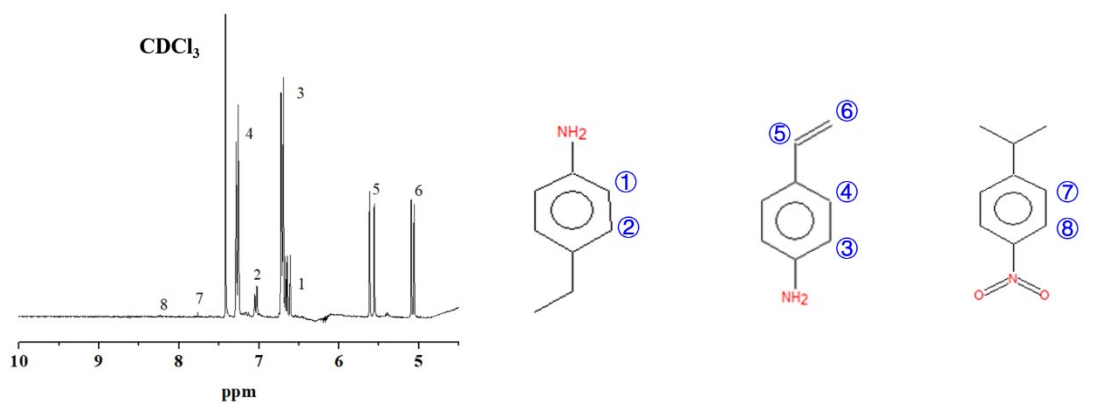

**Figure S10.**  $^1\text{H}$  NMR spectra analysis of Co-NC catalyst for p-nitrostyrene hydrogenation

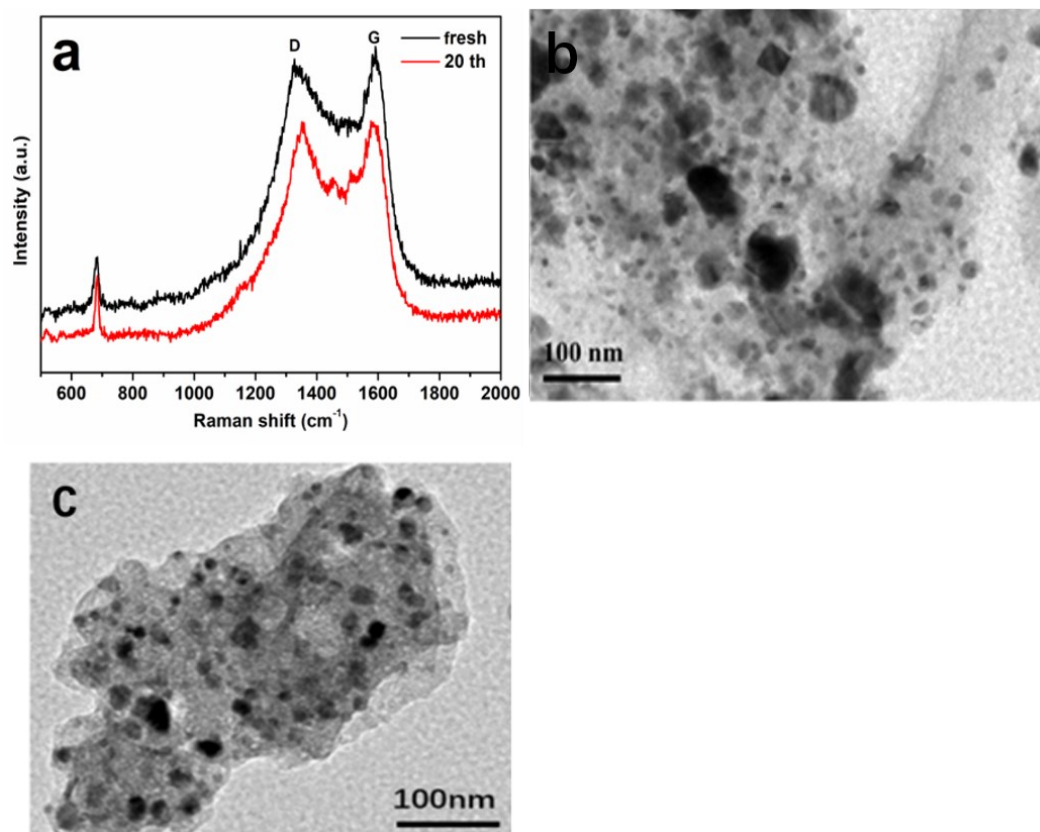

**Figure S11** (a) Raman shift of Co@NC and after 20th-Co@NC, (b,c) Representative TEM image of Co-NC and Co@NC

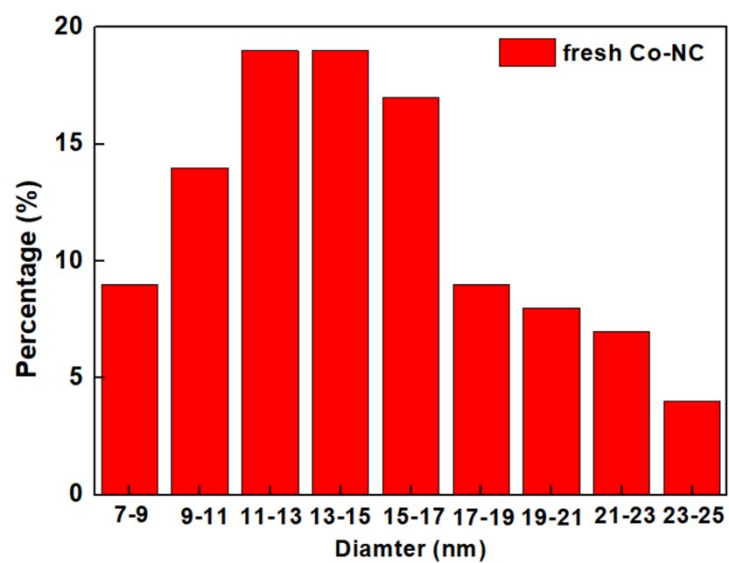

**Figure S12** The metal particle size distribution histogram of fresh Co-NC

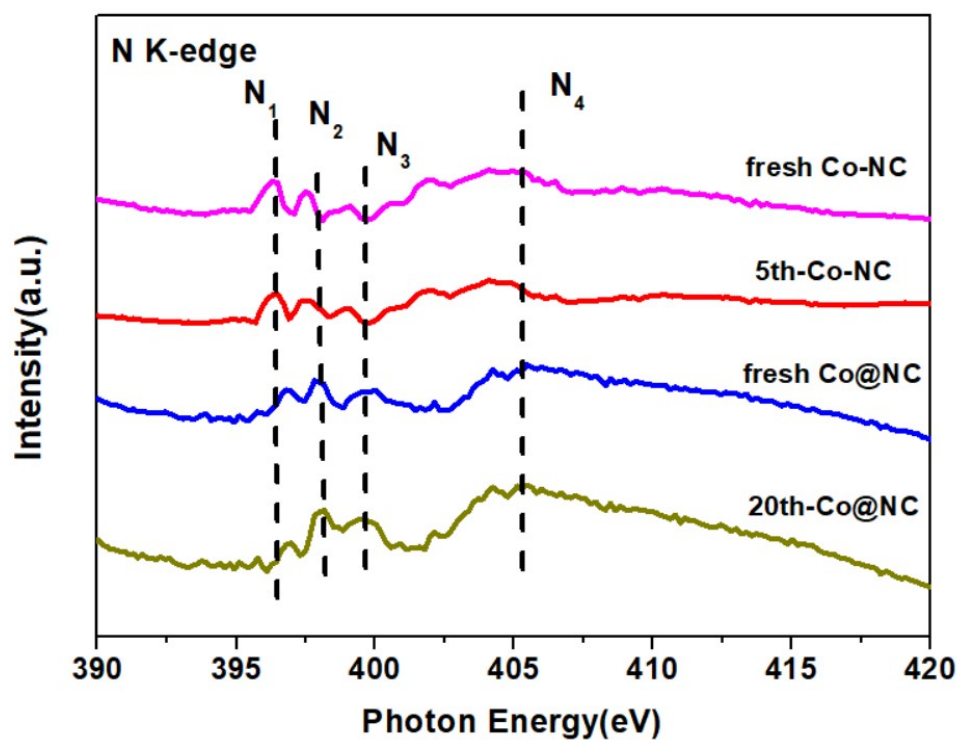

**Figure S13** XANES N K-edge spectra of fresh Co-NC, 5th-Co-NC, fresh Co@NC and 20th-Co@NC respectively

## References

- [1] B. Chen, F. Li, Z. Huang, G. Yuan, *ChemCatChem* 2016, 8 (6), 1132-1138.
- [2] Y. Cao, K. Liu, C. Wu, H. Zhang, Q. Zhang, *Appl. Catal., A* **2020**, 592, 117434.
- [3] H.-Z. Zhu, Y.-M. Lu, F.-J. Fan, S.-H. Yu, *Nanoscale* **2013**, 5, 7219-7223.
- [4] Z. Zhao, H. Yang, Y. Li, X. Guo, *Green Chem.* 2014, 16, 1274-1281.
- [5] D. R. Petkar, B. S. Kadu, R. C. Chikate, *RSC Adv.* 2014, 4, 8004-8010.
